# Supplementary material for: Smoking increases the risk of COVID-19 positivity, while Never-smoking reduces the risk
Source: bioRxiv or medRxiv preprint supplement (doi:10.1101/2020.11.30.20241380), 2020-12-02
Supplement: Supplementary file [file media-2.pdf]

## **Supplementary 2**

**The analysis of COVID-19 and Age among the never smokers and current smokers (excluding the former smokers)**

Table T1 below shows the association between COVID-19 and age adjusting for smoking status. The 50 to 69 year old patients were more likely to test positive for COVID-19, while COPD, Parkinson’s disease and demyelinating disease patients were less likely to test positive for COVID-19.

| <b>Table T1: The Association between COVID-19 Status and Age adjusting for smoking status</b> |                                        |                              |                               |                     |
|-----------------------------------------------------------------------------------------------|----------------------------------------|------------------------------|-------------------------------|---------------------|
|                                                                                               | COVID-19                               | P-Value                      | RR (Confidence Interval)      |                     |
| <b>Smoking status</b>                                                                         | Never-Current Smokers                  | 0.485                        | 0.973 (0.901-1.051)           |                     |
| <b>Demographics</b>                                                                           | Age Categories                         | 20-39 years                  | Reference<br>1                |                     |
|                                                                                               |                                        | 40-49 years                  | 0.289<br>1.090 (0.930-1.278)  |                     |
|                                                                                               |                                        | 50-69 years                  | 0.019<br>1.084 (1.013-1.159)  |                     |
|                                                                                               |                                        | 70-100 years                 | 0.076<br>1.130 (0.987-1.293)  |                     |
|                                                                                               | Gender                                 | 0.060                        | 1.081 (0.997-1.173)           |                     |
| <b>Medical comorbidities</b>                                                                  | COPD                                   | Absent                       | Reference<br>1                |                     |
|                                                                                               |                                        | Present                      | 0.010<br>0.874 (0.789-0.968)  |                     |
|                                                                                               | CHF                                    |                              | 0.096                         | 0.943 (0.879-1.011) |
|                                                                                               | Diabetes                               |                              | 0.829                         | 1.010 (0.925-1.102) |
|                                                                                               | Hypertension                           |                              | 0.396                         | 1.037 (0.954-1.128) |
|                                                                                               | Non-COVID-19 respiratory viral illness | Absent                       | Reference<br>1                |                     |
|                                                                                               |                                        | Present                      | 0.005<br>0.904 (0.842- 0.971) |                     |
|                                                                                               | BMI4                                   |                              | 0.090                         | 1.006 (0.999-1.014) |
|                                                                                               | Lymphocyte 1500                        |                              | 0.874                         | 0.994 (0.918-1.075) |
|                                                                                               | Asthma                                 |                              | 0.565                         | 1.035 (0.920-1.164) |
|                                                                                               | CKD                                    |                              | 0.072                         | 0.915 (0.831-1.008) |
|                                                                                               | SLE                                    |                              | 0.759                         | 0.968 (0.789-1.189) |
|                                                                                               | Organ Transplant                       |                              | 0.393                         | 0.946 (0.834-1.074) |
|                                                                                               | CAD                                    |                              | 0.501                         | 0.967 (0.878-1.065) |
|                                                                                               | HIV                                    |                              |                               | 1                   |
|                                                                                               | Parkinson’s disease                    | Absent                       | Reference<br>1                |                     |
|                                                                                               |                                        | Present                      | 0.008<br>0.816 (0.702-0.905)  |                     |
|                                                                                               | Multiple sclerosis                     |                              | 0.812                         | 0.983 (0.853-1.133) |
|                                                                                               | ESRD                                   |                              | 0.212                         | 0.938 (0.849-1.037) |
|                                                                                               | Stroke                                 |                              | 0.211                         | 0.956 (0.891-1.026) |
| Demyelinating disease                                                                         | Absent                                 | Reference<br>1               |                               |                     |
|                                                                                               | Present                                | 0.036<br>0.860 (0.747-0.990) |                               |                     |
|                                                                                               | _cons                                  | 0.026                        | 1.636 (1.06-2.523)            |                     |

Table T2 below shows the association between COVID-19 and age without adjusting for smoking status. The males and 50 to 69 year old patients were more likely to test positive for COVID-19, while CHF, HIV positive, ESRD and demyelinating disease patients were less likely to test positive for COVID-19.

| <b>Table T2: The Association between COVID-19 Status and Age without adjusting for Smoking status</b> |                                        |              |                     |                          |
|-------------------------------------------------------------------------------------------------------|----------------------------------------|--------------|---------------------|--------------------------|
|                                                                                                       | COVID-19                               |              | P-Value             | RR (Confidence Interval) |
| <b>Demographics</b>                                                                                   | Age Categories                         | 20-39 years  | Reference           | 1                        |
|                                                                                                       |                                        | 40-49 years  | 0.048               | 1.152 (1.002-1.325)      |
|                                                                                                       |                                        | 50-69 years  | 0.015               | 1.081 (1.016-1.150)      |
|                                                                                                       |                                        | 70-100 years | 0.312               | 1.041 (0.963-1.126)      |
|                                                                                                       | Gender                                 | Female       | Reference           | 1                        |
|                                                                                                       |                                        | Male         | 0.007               | 1.085 (1.022-1.151)      |
| <b>Medical comorbidities</b>                                                                          | COPD                                   |              | 0.111               | 0.955 (0.902-1.010)      |
|                                                                                                       | CHF                                    | Absent       | Reference           | 1                        |
|                                                                                                       |                                        | Present      | 0.018               | 0.947 (0.905-0.991)      |
|                                                                                                       | Diabetes                               |              | 0.568               | 0.980 (0.916-1.049)      |
|                                                                                                       | Hypertension                           |              | 0.095               | 1.062 (0.990-1.140)      |
|                                                                                                       | Non-COVID-19 respiratory viral illness | Absent       | Reference           | 1                        |
|                                                                                                       |                                        | Present      | 0.000               | 0.908 (0.863-0.953)      |
|                                                                                                       | BMI                                    |              | 0.195               | 1.003 (0.998-1.008)      |
|                                                                                                       | Lymphocyte                             |              | 0.771               | 1.009 (0.951-1.070)      |
|                                                                                                       | Asthma                                 |              | 0.411               | 1.048 (0.937-1.172)      |
|                                                                                                       | CKD                                    |              | 0.539               | 1.039 (0.920-1.173)      |
|                                                                                                       | SLE                                    |              | 0.167               | 0.945 (0.872-1.024)      |
|                                                                                                       | Organ Transplant                       |              | 0.063               | 0.894 (0.793-1.006)      |
|                                                                                                       | CAD                                    |              | 0.711               | 1.015 (0.937-1.101)      |
|                                                                                                       | HIV                                    | Absent       | Reference           | 1                        |
|                                                                                                       |                                        | Present      | 0.001               | 0.876 (0.813-0.944)      |
|                                                                                                       | Parkinson's disease                    |              | 0.080               | 0.911 (0.822-1.011)      |
|                                                                                                       | Multiple sclerosis                     |              | 0.148               | 0.949 (0.884-1.019)      |
|                                                                                                       | ESRD                                   | Absent       | Reference           | 1                        |
|                                                                                                       |                                        | Present      | 0.012               | 0.909 (0.843-0.979)      |
| Stroke                                                                                                |                                        | 0.383        | 0.968 (0.899-1.042) |                          |
| Demyelinating disease                                                                                 |                                        | 0.297        | 0.932 (0.817-1.064) |                          |
| _cons                                                                                                 |                                        | 0.145        | 1.343 (0.904-1.997) |                          |

Table T3 below shows the association between COVID-19 and age among never smokers. Male never smokers were more likely to test positive for COVID-19, while CHF, organ transplant, HIV positive, ESRD, non-COVID-19 respiratory viral illness patients were less likely to test positive for COVID-19.

| <b>Table T3: The Association between COVID-19 Status and Age among the never smokers</b> |                                        |              |                     |                         |
|------------------------------------------------------------------------------------------|----------------------------------------|--------------|---------------------|-------------------------|
|                                                                                          | COVID-19                               |              | P-Value             | RR (95% Conf. Interval) |
| <b>Demographics</b>                                                                      | Age Categories                         | 20-39 years  | Reference           | 1                       |
|                                                                                          |                                        | 40-49 years  | 0.212               | 1.101 (0.946-1.281)     |
|                                                                                          |                                        | 50-69 years  | 0.045               | 1.078 (1.002-1.160)     |
|                                                                                          |                                        | 70-100 years | 0.829               | 1.009 (0.927-1.098)     |
|                                                                                          | Gender                                 | Female       | Reference           | 1                       |
|                                                                                          |                                        | Male         | 0.008               | 1.010 (1.025-1.180)     |
| <b>Medical comorbidities</b>                                                             | COPD                                   |              | 0.149               | 0.955 (0.896-1.017)     |
|                                                                                          | CHF                                    | Absent       | Reference           | 1                       |
|                                                                                          |                                        | Present      | 0.007               | 0.931 (0.884-0.981)     |
|                                                                                          | Diabetes                               |              | 0.843               | 0.993 (0.922-1.068)     |
|                                                                                          | Hypertension                           |              | 0.084               | 1.074 (0.991-1.163)     |
|                                                                                          | Non-COVID-19 respiratory viral illness | Absent       | Reference           | 1                       |
|                                                                                          |                                        | Present      | 0.000               | 0.896 ( 0.847-0.949)    |
|                                                                                          | BMI                                    |              | 0.704               | 1.001 (0.996-1.006)     |
|                                                                                          | Lymphocyte                             |              | 0.646               | 1.017 (0.945-1.096)     |
|                                                                                          | Asthma                                 |              | 0.261               | 1.083 (0.943-1.243)     |
|                                                                                          | CKD                                    |              | 0.529               | 1.042 (0.917-1.184)     |
|                                                                                          | SLE                                    |              | 0.092               | 0.938 (0.870-1.011)     |
|                                                                                          | Organ Transplant                       | Absent       | Reference           | 1                       |
|                                                                                          |                                        | Present      | 0.024               | 0.860 (0.755-0.980)     |
|                                                                                          | CAD                                    |              | 0.533               | 1.030 (0.937-1.134)     |
|                                                                                          | HIV                                    | Absent       | Reference           | 1                       |
|                                                                                          |                                        | Present      | 0.001               | 0.875 (0.809-0.947)     |
|                                                                                          | Parkinson's disease                    |              | 0.171               | 0.917 (0.811-1.038)     |
|                                                                                          | Multiple sclerosis                     |              | 0.735               | 0.981 (0.879-1.095)     |
|                                                                                          | ESRD                                   | Absent       | Reference           | 1                       |
|                                                                                          |                                        | Present      | 0.007               | 0.888 (0.814-0.969)     |
|                                                                                          | Stroke                                 |              | 0.232               | 0.946 (0.865-1.036)     |
|                                                                                          | Demyelinating disease                  |              | 0.757               | 1.018 (0.908-1.142)     |
| _cons                                                                                    |                                        | 0.308        | 1.243 (0.819-1.886) |                         |

Table T4 below shows the association between COVID-19 and age among the current smokers. The 40 to 49 year old current smokers were more likely to test positive for COVID-19, while HIV positive, Non-COVID-19 respiratory viral illness current smokers while less likely to test positive for COVID-19.

| <b>Table T4: The Association between COVID-19 Status and Age among the current smokers</b> |                                        |              |                     |                         |
|--------------------------------------------------------------------------------------------|----------------------------------------|--------------|---------------------|-------------------------|
|                                                                                            | COVID-19                               |              | P-Value             | RR [95% Conf. Interval] |
| <b>Demographics</b>                                                                        | Age                                    | 20-39 years  | Reference           | 1                       |
|                                                                                            |                                        | 40-49 years  | 0.018               | 1.309 (1.047-1.635)     |
|                                                                                            |                                        | 50-69 years  | 0.143               | 1.063 (0.980-1.153)     |
|                                                                                            |                                        | 70-100 years | 0.817               | 0.990 (0.907-1.080)     |
|                                                                                            | Gender                                 |              | 0.053               | 1.064 (0.999-1.132)     |
| <b>Medical comorbidities</b>                                                               | COPD                                   |              | 0.707               | 0.989 (0.933-1.048)     |
|                                                                                            | CHF                                    |              | 0.061               | 0.943 (0.887-1.003)     |
|                                                                                            | Diabetes                               |              | 0.150               | 0.945 (0.874-1.021)     |
|                                                                                            | Hypertension                           |              | 0.104               | 1.080 (0.984-1.186)     |
|                                                                                            | Non-COVID-19 respiratory viral illness | Absent       | Reference           | 1                       |
|                                                                                            |                                        | Present      | 0.005               | 0.907 (0.846 -0.972)    |
|                                                                                            | BMI4                                   |              | 0.359               | 1.003 (0.997-1.008)     |
|                                                                                            | Lymphocyte                             |              | 0.270               | 1.035 (0.974-1.100)     |
|                                                                                            | Asthma                                 |              | 0.758               | 1.021 (0.894-1.167)     |
|                                                                                            | CKD                                    |              | 0.122               | 1.125 (0.969-1.308)     |
|                                                                                            | SLE                                    |              | 0.188               | 0.918 (0.808-1.043)     |
|                                                                                            | Organ Transplant                       |              |                     | 1                       |
|                                                                                            | CAD                                    |              | 0.592               | 1.023 (0.941-1.113)     |
|                                                                                            | HIV                                    | Absent       |                     |                         |
|                                                                                            |                                        | Present      | 0.006               | 0.863 (0.775-0.959)     |
|                                                                                            | Parkinson's disease                    |              | 0.555               | 1.032 (0.930-1.144)     |
|                                                                                            | Multiple sclerosis                     |              | 0.098               | 0.898 (0.791-1.020)     |
|                                                                                            | ESRD                                   |              | 0.092               | 0.936 (0.867-1.011)     |
|                                                                                            | Stroke                                 |              | 0.680               | 0.980 (0.892-1.077)     |
|                                                                                            | Demyelinating disease                  |              | 0.147               | 0.929 (0.841-1.026)     |
| _cons                                                                                      |                                        | 0.906        | 1.025 (0.678-1.549) |                         |

Table T5 below shows the homogeneity test. The difference between never smokers and current smokers among the COPD, CHF, non-COVID-19 respiratory viral illness and Parkinson's disease is significantly different as shown by the homogeneity test in Supplementary table S3.

| <b>Table T5: The homogeneity test</b> |                        |        |                      |                         |
|---------------------------------------|------------------------|--------|----------------------|-------------------------|
|                                       | COVID-19               |        | P-Value              | RR [95% Conf. Interval] |
| <b>Smoking Status</b>                 | Never-Current Smokers  |        | 0.434                | 0.973 (0.908- 1.042)    |
| <b>Demographics</b>                   | Age Categories         | 20-39  | Reference            | 1                       |
|                                       |                        | 40-49  | 0.146                | 1.267 (0.921- 1.742)    |
|                                       |                        | 50-59  | 0.046                | 1.063 (1.001- 1.128)    |
|                                       |                        | 70-100 | 0.047                | 1.120 (1.001- 1.252)    |
|                                       | 2.NevCurSmokers        |        | Reference            | 1                       |
|                                       | AgeCat6#NevCurSmokers  | 20 2   | Reference            | 1                       |
|                                       |                        | 40 2   | 0.142                | 0.782 (0.563- 1.086)    |
|                                       |                        | 50 2   | 0.837                | 1.011 (0.911- 1.122)    |
|                                       |                        | 70 2   | 0.728                | 0.975 (0.844- 1.126)    |
|                                       | Gender#c.NevCurSmokers |        | Reference            | 1                       |
| Male                                  |                        | 0.096  | 1.044 (0.992- 1.098) |                         |
| <b>Medical comorbidities</b>          | COPD#c.NevCurSmokers   |        | 1                    | Reference               |
|                                       |                        | Yes    | 0.006                | 0.921 (0.868- 0.977)    |
|                                       | CHF#c.NevCurSmokers    |        | 1                    | Reference               |
|                                       |                        | Yes    | 0.029                | 0.959 (0.923- 0.996)    |
|                                       | Diabetes               |        | 0.602                | 1.023 (0.940- 1.112)    |
|                                       | Hypertension           |        | 0.541                | 1.026 (0.945- 1.113)    |
|                                       | Viral1#c.NevCurSmokers |        | Reference            | 1                       |
|                                       |                        | 2 Yes  | 0.003                | 0.950 (0.918 - 0.983)   |
|                                       | BMI4                   |        | 0.086                | 1.006 (0.999- 1.013)    |
|                                       | Lymphocyt1e            |        | 0.988                | 1.001 (0.925- 1.082)    |
|                                       | Asthma                 |        | 0.553                | 1.038 (0.918- 1.172)    |
|                                       | CKD                    |        | 0.058                | 0.907 (0.820- 1.003)    |
|                                       | SLE                    |        | 0.247                | 0.817 (0.580- 1.150)    |
|                                       | Organ Transplant       |        | 0.262                | 0.930 (0.820- 1.056)    |
|                                       | CAD                    |        | 0.891                | 0.993 (0.902- 1.094)    |
|                                       | HIV                    |        | Reference            | 1                       |
|                                       | Parkinson's disease    |        | 0.006                | 0.819 (0.709- 0.945)    |
|                                       | Multiple sclerosis     |        | 0.605                | 1.034 (0.911- 1.174)    |
|                                       | ESRD#c.NevCurSmokers   |        | Reference            | 1                       |
|                                       |                        | Yes    | 0.311                | 0.966 (0.904- 1.033)    |
|                                       | Stroke                 |        | 0.110                | 0.945 (0.882- 1.013)    |
|                                       | Demyelinating disease  |        | 0.153                | 0.923 (0.826- 1.030)    |

## **Abbreviations**

ACE-2 angiotensin converting enzyme 2

CAD coronary artery disease

CDC center for disease control

COPD chronic obstructive pulmonary disease

BMI body mass index

SLE systemic lupus erythromatosus

CHF congestive heart failure

ESRD end stage renal disease

CKD chronic kidney disease

COVID-19 corona virus disease 2019

HIV human immunodeficiency virus

Interquartile range IQR

Polymerase chain reaction PCR

RSV respiratory syncytial virus

USA united states of America

UK United Kingdom
